# Supplementary material for: Design of visible-light-response core–shell Fe2O3/CuBi2O4 heterojunctions with enhanced photocatalytic activity towards the degradation of tetracycline: Z-scheme photocatalytic mechanism insight
Source: Royal Society of Chemistry journal article supplement (doi:10.1039/c8qi00906f), 2018-01-01
Supplement: c8qi00906f1.pdf [file c8qi00906f1.pdf]

# Design of visible-light-response core-shell $\text{Fe}_2\text{O}_3/\text{CuBi}_2\text{O}_4$ heterojunctions with enhanced photocatalytic activity towards the degradation of tetracycline: Z-scheme photocatalytic mechanism insight

## Supporting Information

Ming-yang Li,<sup>a</sup> Yu-bin Tang,<sup>\*a</sup> Wei-long Shi,<sup>a, b</sup> Fang-yan Chen,<sup>\*a</sup> Yu Shi,<sup>a</sup> and Hao-chen Gu<sup>a</sup>

<sup>a</sup> School of Environmental and Chemical Engineering, Jiangsu University of Science and Technology, Zhenjiang, Jiangsu 212018, China

<sup>b</sup> College of Material Science and Engineering, Jiangsu University of Science and Technology, Zhenjiang, Jiangsu 212003, PR China

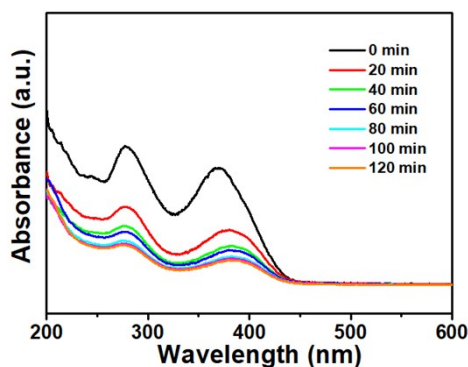

**Fig. S1** Changes of the characteristic absorption of TC by using 30%  $\text{Fe}_2\text{O}_3/\text{CBO}$  as a photocatalyst.

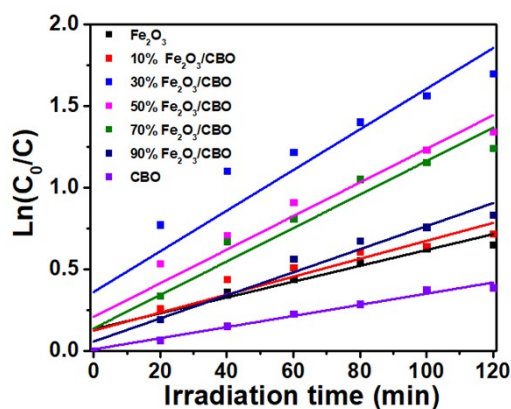

**Fig. S2** Kinetic curves of the TC photodegradation with as-prepared photocatalysts under visible light irradiation ( $\lambda > 420 \text{ nm}$ ).

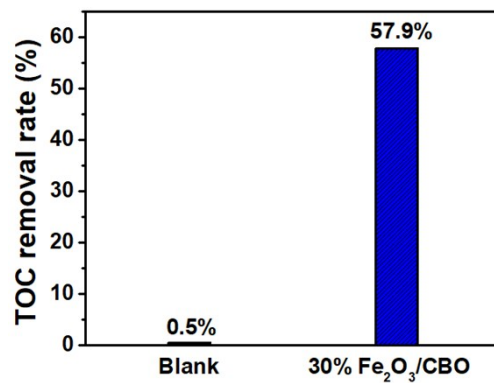

**Fig.S3** TOC removal ratio of TC ( $C_0 = 10$  mg/L) over the 30% Fe<sub>2</sub>O<sub>3</sub>/CBO and directly photolysis under visible light irradiation ( $\lambda > 420$  nm).
